# Supplementary material
Source: Springer Nature journal article supplement (https://www.springermedizin.de/resource/supplementary/12913_2007_621_MOESM2_ESM.pdf/9535812)
Supplement: MOESM2 [file 9535812]

**Supplementary table 1**  
**Multivariate components of variance analysis**  
**Adult population**

**Total population**

|                |             | Parameter | % variance | Estimate | Std. Error | Wald   | Sig. | 95% CI |       |
|----------------|-------------|-----------|------------|----------|------------|--------|------|--------|-------|
|                |             |           |            |          |            |        |      | lower  | upper |
| Center A       |             |           |            |          |            |        |      |        |       |
| Fixed          | Intercept   |           |            | 4.95     | 0.28       | 17.37  | 0.00 | 4.38   | 5.52  |
|                | age         |           |            | 0.66     | 0.01       | 77.00  | 0.00 | 0.64   | 0.68  |
|                | age squared |           |            | -0.02    | 0.00       | -6.67  | 0.00 | -0.03  | -0.02 |
| Variance       |             |           | 1.4%       | 0.15     |            |        |      |        |       |
| Random         | Residual    |           | 51.5%      | 5.77     | 0.04       | 162.06 | 0.00 | 5.70   | 5.84  |
|                | ACG         |           | 44.7%      | 5.01     | 0.89       | 5.64   | 0.00 | 3.54   | 7.10  |
|                | MED         |           | 2.4%       | 0.27     | 0.06       | 4.39   | 0.00 | 0.17   | 0.43  |
| Total variance |             |           | 100.0%     | 11.21    |            |        |      |        |       |

**Two part model**

**Expenditure incurrence**

|          |             | Parameter | % Variance | B     | S.E. | Wald     | Sig. | Exp(B) |
|----------|-------------|-----------|------------|-------|------|----------|------|--------|
| Center A |             |           |            |       |      |          |      |        |
| Fixed    | age         |           |            | 0.13  | 0.01 | 175.53   | 0.00 | 1.14   |
|          | age squared |           |            | -0.02 | 0.00 | 24.84    | 0.00 | 0.98   |
|          | Intercept   |           |            | 1.91  | 0.02 | 15769.60 | 0.00 | 6.75   |
| Variance |             |           | 0.6%       |       |      |          |      |        |
| Random   | MED         |           | 1.5%       |       |      |          |      |        |
|          | ACG         |           | 28.8%      |       |      |          |      |        |
|          | Residual    |           | 69.1%      |       |      |          |      |        |
|          | Total       |           | 100.0%     |       |      |          |      |        |

**Level of expenditure**

|                |             | Parameter | % variance | Estimate | Std. Error | Wald   | Sig. | 95% CI |       |
|----------------|-------------|-----------|------------|----------|------------|--------|------|--------|-------|
|                |             |           |            |          |            |        |      | lower  | upper |
| Center A       |             |           |            |          |            |        |      |        |       |
| Fixed          | Intercept   |           |            | 5.76     | 0.21       | 26.85  | 0.00 | 5.34   | 6.19  |
|                | age         |           |            | 0.62     | 0.01       | 79.29  | 0.00 | 0.60   | 0.63  |
|                | age squared |           |            | -0.02    | 0.00       | -6.29  | 0.00 | -0.03  | -0.01 |
| Variance       |             |           | 10.5%      | 0.82     |            |        |      |        |       |
| Random         | Residual    |           | 52.3%      | 4.11     | 0.03       | 151.04 | 0.00 | 4.06   | 4.16  |
|                | ACG         |           | 35.4%      | 2.78     | 0.49       | 5.65   | 0.00 | 1.96   | 3.93  |
|                | MED         |           | 1.8%       | 0.14     | 0.03       | 4.34   | 0.00 | 0.09   | 0.23  |
| Total variance |             |           | 100.0%     | 7.85     |            |        |      |        |       |

**Supplementary table 2**  
**Multivariate components of variance analysis**  
**Pediatrics**

**Total population**

|                | Parameter   | % variance | Estimate | Std. Error | Wald  | Sig. | 95% CI |       |
|----------------|-------------|------------|----------|------------|-------|------|--------|-------|
|                |             |            |          |            |       |      | lower  | upper |
| Center A       |             |            |          |            |       |      |        |       |
| Fixed          | Intercept   |            | 2.35     | 0.40       | 5.84  | 0.00 | 1.49   | 3.20  |
|                | age         |            | -0.29    | 0.05       | -5.74 | 0.00 | -0.39  | -0.19 |
|                | age squared |            | 0.04     | 0.04       | 0.93  | 0.35 | -0.04  | 0.11  |
| Variance       |             | 0.1%       | 0.00     |            |       |      |        |       |
| Random         | Residual    | 48.3%      | 2.66     | 0.04       | 70.29 | 0.00 | 2.58   | 2.73  |
|                | ACG         | 22.2%      | 1.22     | 0.28       | 4.43  | 0.00 | 0.79   | 1.90  |
|                | MED         | 29.5%      | 1.62     | 0.69       | 2.34  | 0.02 | 0.70   | 3.75  |
| Total variance |             | 100.0%     | 5.51     |            |       |      |        |       |

**Two part model**

**Expenditure incurrence**

|          |             | % Variance | B     | S.E. | Wald   | Sig. | Exp(B) |
|----------|-------------|------------|-------|------|--------|------|--------|
| Center A |             |            |       |      |        |      |        |
| Fixed    | age         |            | -0.27 | 0.06 | 18.66  | 0.00 | 0.76   |
|          | age squared |            | -0.30 | 0.13 | 5.50   | 0.02 | 0.74   |
|          | Intercept   |            | 0.46  | 0.02 | 338.34 | 0.00 | 1.58   |
| Variance |             | 0.4%       |       |      |        |      |        |
| Random   | MED         | 38.8%      |       |      |        |      |        |
|          | ACG         | 20.6%      |       |      |        |      |        |
|          | Residual    | 40.2%      |       |      |        |      |        |
|          | Total       | 100.0%     |       |      |        |      |        |

**Level of expenditure**

|                | Parameter   | % variance | Estimate | Std. Error | Wald  | Sig. | 95% CI |       |
|----------------|-------------|------------|----------|------------|-------|------|--------|-------|
|                |             |            |          |            |       |      | lower  | upper |
| Center A       |             |            |          |            |       |      |        |       |
| Fixed          | Intercept   |            | 3.66     | 0.21       | 17.62 | 0.00 | 3.23   | 4.08  |
|                | age         |            | -0.09    | 0.06       | -1.58 | 0.11 | -0.20  | 0.02  |
|                | age squared |            | -0.08    | 0.06       | -1.27 | 0.20 | -0.20  | 0.04  |
| Variance       |             | 0.0%       | 0.00     |            |       |      |        |       |
| Random         | Residual    | 66.7%      | 1.98     | 0.04       | 54.52 | 0.00 | 1.91   | 2.05  |
|                | ACG         | 22.4%      | 0.66     | 0.17       | 3.95  | 0.00 | 0.40   | 1.09  |
|                | MED         | 10.9%      | 0.32     | 0.14       | 2.30  | 0.02 | 0.14   | 0.76  |
| Total variance |             | 100.0%     | 2.96     |            |       |      |        |       |

**Supplementary table 3**  
**Parameter estimates by center for Total population**  
**Adults**

|                 | Parameter   | % variance | Estimate | Std. Error | Wald  | Sig. | 95% CI |       |
|-----------------|-------------|------------|----------|------------|-------|------|--------|-------|
|                 |             |            |          |            |       |      | lower  | upper |
| <b>Center A</b> |             |            |          |            |       |      |        |       |
| Fixed           | Intercept   |            | 5.07     | 0.31       | 16.53 | 0.00 | 4.46   | 5.68  |
|                 | age         |            | 0.64     | 0.02       | 34.68 | 0.00 | 0.60   | 0.67  |
|                 | age squared |            | -0.01    | 0.01       | -1.61 | 0.11 | -0.02  | 0.00  |
| Variance        |             | 5.0%       | 0.55     |            |       |      |        |       |
| Random          | Residual    | 50.7%      | 5.58     | 0.07       | 79.26 | 0.00 | 5.45   | 5.72  |
|                 | ACG         | 43.1%      | 4.75     | 0.93       | 5.10  | 0.00 | 3.23   | 6.97  |
|                 | MED         | 1.2%       | 0.13     | 0.06       | 2.05  | 0.04 | 0.05   | 0.34  |
| Total variance  |             | 100.0%     | 11.01    |            |       |      |        |       |
| <hr/>           |             |            |          |            |       |      |        |       |
| <b>Center B</b> |             |            |          |            |       |      |        |       |
| Fixed           | Intercept   |            | 4.55     | 0.33       | 13.69 | 0.00 | 3.89   | 5.22  |
|                 | age         |            | 0.76     | 0.02       | 35.75 | 0.00 | 0.72   | 0.80  |
|                 | age squared |            | -0.06    | 0.01       | -6.60 | 0.00 | -0.08  | -0.04 |
| Variance        |             | 6.5%       | 0.81     |            |       |      |        |       |
| Random          | Residual    | 51.7%      | 6.44     | 0.10       | 63.46 | 0.00 | 6.24   | 6.64  |
|                 | ACG         | 40.7%      | 5.07     | 1.01       | 5.03  | 0.00 | 3.44   | 7.49  |
|                 | MED         | 1.1%       | 0.14     | 0.09       | 1.66  | 0.10 | 0.04   | 0.46  |
| Total variance  |             | 100.0%     | 12.47    |            |       |      |        |       |
| <hr/>           |             |            |          |            |       |      |        |       |
| <b>Center C</b> |             |            |          |            |       |      |        |       |
| Fixed           | Intercept   |            | 5.45     | 0.28       | 19.32 | 0.00 | 4.88   | 6.01  |
|                 | age         |            | 0.58     | 0.02       | 38.85 | 0.00 | 0.55   | 0.61  |
|                 | age squared |            | -0.01    | 0.01       | -1.82 | 0.07 | -0.02  | 0.00  |
| Variance        |             | 7.5%       | 0.81     |            |       |      |        |       |
| Random          | Residual    | 48.7%      | 5.23     | 0.06       | 91.10 | 0.00 | 5.12   | 5.34  |
|                 | ACG         | 43.1%      | 4.62     | 0.84       | 5.48  | 0.00 | 3.23   | 6.61  |
|                 | MED         | 0.7%       | 0.08     | 0.03       | 2.23  | 0.03 | 0.03   | 0.19  |
| Total variance  |             | 100.0%     | 10.74    |            |       |      |        |       |
| <hr/>           |             |            |          |            |       |      |        |       |
| <b>Center D</b> |             |            |          |            |       |      |        |       |
| Fixed           | Intercept   |            | 5.24     | 0.31       | 17.03 | 0.00 | 4.62   | 5.85  |
|                 | age         |            | 0.64     | 0.02       | 27.29 | 0.00 | 0.60   | 0.69  |
|                 | age squared |            | -0.01    | 0.01       | -1.25 | 0.21 | -0.03  | 0.01  |
| Variance        |             | 4.5%       | 0.49     |            |       |      |        |       |
| Random          | Residual    | 48.9%      | 5.36     | 0.09       | 59.55 | 0.00 | 5.19   | 5.54  |
|                 | ACG         | 46.3%      | 5.08     | 1.03       | 4.91  | 0.00 | 3.41   | 7.57  |
|                 | MED         | 0.3%       | 0.04     | 0.03       | 1.35  | 0.18 | 0.01   | 0.16  |
| Total variance  |             | 100.0%     | 10.97    |            |       |      |        |       |
| <hr/>           |             |            |          |            |       |      |        |       |
| <b>Center E</b> |             |            |          |            |       |      |        |       |
| Fixed           | Intercept   |            | 4.96     | 0.35       | 14.02 | 0.00 | 4.23   | 5.69  |
|                 | age         |            | 0.68     | 0.02       | 30.65 | 0.00 | 0.64   | 0.72  |
|                 | age squared |            | -0.03    | 0.01       | -3.01 | 0.00 | -0.04  | -0.01 |
| Variance        |             | 1.1%       | 0.13     |            |       |      |        |       |
| Random          | Residual    | 57.9%      | 6.57     | 0.10       | 63.08 | 0.00 | 6.37   | 6.78  |
|                 | ACG         | 38.3%      | 4.35     | 0.86       | 5.06  | 0.00 | 2.95   | 6.41  |
|                 | MED         | 2.7%       | 0.30     | 0.19       | 1.55  | 0.12 | 0.09   | 1.07  |
| Total variance  |             | 100.0%     | 11.35    |            |       |      |        |       |

**Supplementary table 4**  
**Parameter estimates by center for Total population**  
**Pediatrics**

|                 | Parameter   | % variance | Estimate | Std. Error | Wald  | Sig. | 95% CI |       |
|-----------------|-------------|------------|----------|------------|-------|------|--------|-------|
|                 |             |            |          |            |       |      | lower  | upper |
| <b>Center A</b> |             |            |          |            |       |      |        |       |
| Fixed           | Intercept   |            | 2.78     | 0.25       | 11.25 | 0.00 | 2.28   | 3.29  |
|                 | age         |            | -0.50    | 0.12       | -4.33 | 0.00 | -0.73  | -0.28 |
|                 | age squared |            | 0.10     | 0.05       | 2.31  | 0.02 | 0.02   | 0.19  |
| Variance        |             | 0.6%       | 0.03     |            |       |      |        |       |
| Random          | Residual    | 53.0%      | 2.37     | 0.08       | 31.21 | 0.00 | 2.23   | 2.53  |
|                 | ACG         | 45.8%      | 2.05     | 0.49       | 4.16  | 0.00 | 1.28   | 3.29  |
|                 | MED         | 0.6%       | 0.03     | 0.03       | 0.88  | 0.38 | 0.00   | 0.25  |
| Total variance  |             | 100.0%     | 4.48     |            |       |      |        |       |
| <hr/>           |             |            |          |            |       |      |        |       |
| <b>Center B</b> |             |            |          |            |       |      |        |       |
| Fixed           | Intercept   |            | 2.10     | 0.99       | 2.13  | 0.27 | -9.15  | 13.34 |
|                 | age         |            | -0.17    | 0.12       | -1.41 | 0.16 | -0.41  | 0.07  |
|                 | age squared |            | 0.09     | 0.19       | 0.46  | 0.64 | -0.29  | 0.46  |
| Variance        |             | 0.03%      | 0.00     |            |       |      |        |       |
| Random          | Residual    | 53.0%      | 3.02     | 0.10       | 29.12 | 0.00 | 2.83   | 3.23  |
|                 | ACG         | 13.8%      | 0.79     | 0.21       | 3.75  | 0.00 | 0.47   | 1.33  |
|                 | MED         | 33.2%      | 1.89     | 2.68       | 0.71  | 0.48 | 0.12   | 30.44 |
| Total variance  |             | 100.0%     | 5.71     |            |       |      |        |       |
| <hr/>           |             |            |          |            |       |      |        |       |
| <b>Center C</b> |             |            |          |            |       |      |        |       |
| Fixed           | Intercept   |            | 3.73     | 0.26       | 14.25 | 0.00 | 3.20   | 4.26  |
|                 | age         |            | -0.27    | 0.10       | -2.55 | 0.01 | -0.47  | -0.06 |
|                 | age squared |            | -0.04    | 0.30       | -0.15 | 0.88 | -0.63  | 0.54  |
| Variance        |             | 0.5%       | 0.02     |            |       |      |        |       |
| Random          | Residual    | 53.2%      | 2.82     | 0.07       | 39.12 | 0.00 | 2.68   | 2.96  |
|                 | ACG         | 46.2%      | 2.45     | 0.60       | 4.11  | 0.00 | 1.52   | 3.94  |
|                 | MED         | 0.1%       | 0.01     | 0.01       | 0.65  | 0.52 | 0.00   | 0.16  |
| Total variance  |             | 100.0%     | 5.30     |            |       |      |        |       |
| <hr/>           |             |            |          |            |       |      |        |       |
| <b>Center D</b> |             |            |          |            |       |      |        |       |
| Fixed           | Intercept   |            | 0.45     | 0.08       | 5.82  | 0.00 | 0.28   | 0.62  |
|                 | age         |            | 0.06     | 0.08       | 0.75  | 0.45 | -0.09  | 0.20  |
|                 | age squared |            | -0.02    | 0.18       | -0.10 | 0.92 | -0.36  | 0.33  |
|                 | Age         | 0.1%       | 0.00     |            |       |      |        |       |
| Random          | Residual    | 89.9%      | 1.00     | 0.03       | 28.83 | 0.00 | 0.94   | 1.07  |
|                 | ACG         | 9.9%       | 0.11     | 0.05       | 2.08  | 0.04 | 0.04   | 0.28  |
|                 | MED         | 0.2%       | 0.00     | 0.00       | 0.42  | 0.68 | 0.00   | 0.20  |
| Total variance  |             | 100.0%     | 1.12     |            |       |      |        |       |
| <hr/>           |             |            |          |            |       |      |        |       |
| <b>Center E</b> |             |            |          |            |       |      |        |       |
| Fixed           | Intercept   |            | 1.53     | 0.87       | 1.77  | 0.32 | -8.44  | 11.51 |
|                 | age         |            | -0.24    | 0.13       | -1.78 | 0.08 | -0.50  | 0.02  |
|                 | age squared |            | -0.25    | 0.33       | -0.74 | 0.46 | -0.90  | 0.41  |
|                 | Age         | 0.3%       | 0.01     |            |       |      |        |       |
| Random          | Residual    | 59.2%      | 2.81     | 0.11       | 25.89 | 0.00 | 2.60   | 3.03  |
|                 | ACG         | 9.6%       | 0.46     | 0.15       | 3.06  | 0.00 | 0.24   | 0.87  |
|                 | MED         | 30.9%      | 1.47     | 2.08       | 0.71  | 0.48 | 0.09   | 23.62 |
| Total variance  |             | 100.0%     | 4.74     |            |       |      |        |       |

**Supplementary table 5**  
**Parameter estimates by center for Expenditure incurrence**  
**Adults**

|                 |             | % Variance | B     | S.E. | Wald    | Sig. | Exp(B) |
|-----------------|-------------|------------|-------|------|---------|------|--------|
| <b>Center A</b> |             |            |       |      |         |      |        |
| Fixed           | age         |            | 0.19  | 0.02 | 88.25   | 0.00 | 1.21   |
|                 | age squared |            | -0.04 | 0.01 | 29.06   | 0.00 | 0.96   |
|                 | Intercept   |            | 1.87  | 0.03 | 3818.52 | 0.00 | 6.51   |
| Variance        |             | 1.2%       |       |      |         |      |        |
| Random          | MED         | 0.9%       |       |      |         |      |        |
|                 | ACG         | 32.9%      |       |      |         |      |        |
|                 | Residual    | 65.0%      |       |      |         |      |        |
|                 | Total       | 100.0%     |       |      |         |      |        |
| <hr/>           |             |            |       |      |         |      |        |
| <b>Center B</b> |             |            |       |      |         |      |        |
| Fixed           | age         |            | 0.03  | 0.02 | 2.02    | 0.16 | 1.03   |
|                 | age squared |            | -0.03 | 0.01 | 14.57   | 0.00 | 0.97   |
|                 | Intercept   |            | 1.85  | 0.04 | 2513.28 | 0.00 | 6.33   |
| Variance        |             | 0.3%       |       |      |         |      |        |
| Random          | MED         | 1.2%       |       |      |         |      |        |
|                 | ACG         | 29.6%      |       |      |         |      |        |
|                 | Residual    | 69.0%      |       |      |         |      |        |
|                 | Total       | 100.0%     |       |      |         |      |        |
| <hr/>           |             |            |       |      |         |      |        |
| <b>Center C</b> |             |            |       |      |         |      |        |
| Fixed           | age         |            | 0.11  | 0.02 | 34.47   | 0.00 | 1.12   |
|                 | age squared |            | 0.00  | 0.01 | 0.30    | 0.58 | 1.00   |
|                 | Intercept   |            | 1.98  | 0.03 | 4859.30 | 0.00 | 7.24   |
| Variance        |             | 0.5%       |       |      |         |      |        |
| Random          | MED         | 1.3%       |       |      |         |      |        |
|                 | ACG         | 32.0%      |       |      |         |      |        |
|                 | Residual    | 66.2%      |       |      |         |      |        |
|                 | Total       | 100.0%     |       |      |         |      |        |
| <hr/>           |             |            |       |      |         |      |        |
| <b>Center D</b> |             |            |       |      |         |      |        |
| Fixed           | age         |            | 0.24  | 0.03 | 82.97   | 0.00 | 1.27   |
|                 | age squared |            | -0.05 | 0.01 | 23.58   | 0.00 | 0.95   |
|                 | Intercept   |            | 1.88  | 0.04 | 2129.04 | 0.00 | 6.58   |
| Variance        |             | 2.0%       |       |      |         |      |        |
| Random          | MED         | 1.9%       |       |      |         |      |        |
|                 | ACG         | 33.7%      |       |      |         |      |        |
|                 | Residual    | 62.3%      |       |      |         |      |        |
|                 | Total       | 100.0%     |       |      |         |      |        |
| <hr/>           |             |            |       |      |         |      |        |
| <b>Center E</b> |             |            |       |      |         |      |        |
| Fixed           | age         |            | 0.10  | 0.03 | 16.31   | 0.00 | 1.11   |
|                 | age squared |            | 0.01  | 0.01 | 1.46    | 0.23 | 1.01   |
|                 | Intercept   |            | 1.89  | 0.04 | 2208.10 | 0.00 | 6.64   |
| Variance        |             | 0.6%       |       |      |         |      |        |
| Random          | MED         | 1.6%       |       |      |         |      |        |
|                 | ACG         | 21.3%      |       |      |         |      |        |
|                 | Residual    | 76.6%      |       |      |         |      |        |
|                 | Total       | 100.0%     |       |      |         |      |        |

**Supplementary table 6**  
**Parameter estimates by center for Level of expenditure**  
**Adults**

|                 | Parameter   | % variance | Estimate | Std. Error | Wald  | Sig. | 95% CI |       |
|-----------------|-------------|------------|----------|------------|-------|------|--------|-------|
|                 |             |            |          |            |       |      | lower  | upper |
| <b>Center A</b> |             |            |          |            |       |      |        |       |
| Fixed           | Intercept   |            | 5.85     | 0.25       | 23.27 | 0.00 | 5.35   | 6.35  |
|                 | age         |            | 0.58     | 0.02       | 33.84 | 0.00 | 0.55   | 0.61  |
|                 | age squared |            | -0.01    | 0.01       | -1.13 | 0.26 | -0.02  | 0.01  |
| Variance        |             | 6.8%       | 0.52     |            |       |      |        |       |
| Random          | Residual    | 51.8%      | 3.97     | 0.05       | 73.55 | 0.00 | 3.86   | 4.07  |
|                 | ACG         | 40.3%      | 3.09     | 0.61       | 5.03  | 0.00 | 2.09   | 4.56  |
|                 | MED         | 1.1%       | 0.09     | 0.04       | 2.03  | 0.04 | 0.03   | 0.23  |
| Total variance  |             | 100.0%     | 7.66     |            |       |      |        |       |
| <hr/>           |             |            |          |            |       |      |        |       |
| <b>Center B</b> |             |            |          |            |       |      |        |       |
| Fixed           | Intercept   |            | 5.52     | 0.28       | 19.46 | 0.00 | 4.95   | 6.09  |
|                 | age         |            | 0.71     | 0.02       | 36.82 | 0.00 | 0.67   | 0.74  |
|                 | age squared |            | -0.04    | 0.01       | -4.75 | 0.00 | -0.06  | -0.02 |
| Variance        |             | 6.7%       | 0.57     |            |       |      |        |       |
| Random          | Residual    | 52.6%      | 4.49     | 0.08       | 58.66 | 0.00 | 4.35   | 4.65  |
|                 | ACG         | 39.3%      | 3.35     | 0.68       | 4.90  | 0.00 | 2.25   | 5.00  |
|                 | MED         | 1.5%       | 0.13     | 0.08       | 1.67  | 0.09 | 0.04   | 0.41  |
| Total variance  |             | 100.0%     | 8.54     |            |       |      |        |       |
| <hr/>           |             |            |          |            |       |      |        |       |
| <b>Center C</b> |             |            |          |            |       |      |        |       |
| Fixed           | Intercept   |            | 6.02     | 0.23       | 26.02 | 0.00 | 5.56   | 6.49  |
|                 | age         |            | 0.57     | 0.01       | 41.52 | 0.00 | 0.55   | 0.60  |
|                 | age squared |            | -0.01    | 0.01       | -2.15 | 0.03 | -0.02  | 0.00  |
| Variance        |             | 10.6%      | 0.82     |            |       |      |        |       |
| Random          | Residual    | 50.2%      | 3.90     | 0.05       | 85.49 | 0.00 | 3.81   | 3.99  |
|                 | ACG         | 38.3%      | 2.98     | 0.54       | 5.48  | 0.00 | 2.08   | 4.26  |
|                 | MED         | 0.9%       | 0.07     | 0.03       | 2.24  | 0.03 | 0.03   | 0.17  |
| Total variance  |             | 100.0%     | 7.78     |            |       |      |        |       |
| <hr/>           |             |            |          |            |       |      |        |       |
| <b>Center D</b> |             |            |          |            |       |      |        |       |
| Fixed           | Intercept   |            | 6.04     | 0.24       | 24.92 | 0.00 | 5.55   | 6.52  |
|                 | age         |            | 0.57     | 0.02       | 25.44 | 0.00 | 0.52   | 0.61  |
|                 | age squared |            | 0.00     | 0.01       | -0.18 | 0.86 | -0.02  | 0.02  |
| Variance        |             | 6.1%       | 0.45     |            |       |      |        |       |
| Random          | Residual    | 51.7%      | 3.81     | 0.07       | 55.25 | 0.00 | 3.68   | 3.95  |
|                 | ACG         | 42.1%      | 3.10     | 0.63       | 4.94  | 0.00 | 2.08   | 4.61  |
|                 | MED         | 0.1%       | 0.01     | 0.01       | 0.88  | 0.38 | 0.00   | 0.06  |
| Total variance  |             | 100.0%     | 7.37     |            |       |      |        |       |
| <hr/>           |             |            |          |            |       |      |        |       |
| <b>Center E</b> |             |            |          |            |       |      |        |       |
| Fixed           | Intercept   |            | 5.79     | 0.29       | 20.23 | 0.00 | 5.20   | 6.38  |
|                 | age         |            | 0.65     | 0.02       | 33.21 | 0.00 | 0.61   | 0.69  |
|                 | age squared |            | -0.03    | 0.01       | -3.90 | 0.00 | -0.05  | -0.02 |
| Variance        |             | 5.8%       | 0.46     |            |       |      |        |       |
| Random          | Residual    | 56.5%      | 4.48     | 0.08       | 58.98 | 0.00 | 4.34   | 4.63  |
|                 | ACG         | 35.4%      | 2.80     | 0.55       | 5.14  | 0.00 | 1.91   | 4.11  |
|                 | MED         | 2.4%       | 0.19     | 0.12       | 1.55  | 0.12 | 0.05   | 0.66  |
| Total variance  |             | 100.0%     | 7.93     |            |       |      |        |       |

**Supplementary table 7**  
**Parameter estimates by center for Expenditure incurrence**  
**Pediatrics**

|                 |             | % Variance | B     | S.E. | Wald   | Sig. | Exp(B) |
|-----------------|-------------|------------|-------|------|--------|------|--------|
| <b>Center A</b> |             |            |       |      |        |      |        |
| Fixed           | age         |            | -0.23 | 0.18 | 1.75   | 0.19 | 0.79   |
|                 | age squared |            | -0.06 | 0.08 | 0.55   | 0.46 | 0.94   |
|                 | Intercept   |            | 1.25  | 0.05 | 530.49 | 0.00 | 3.50   |
| Variance        |             | 0.4%       |       |      |        |      |        |
| Random          | MED         | 0.0%       |       |      |        |      |        |
|                 | ACG         | 43.8%      |       |      |        |      |        |
|                 | Residual    | 55.8%      |       |      |        |      |        |
|                 | Total       | 100.0%     |       |      |        |      |        |
| <hr/>           |             |            |       |      |        |      |        |
| <b>Center B</b> |             |            |       |      |        |      |        |
| Fixed           | age         |            | -0.44 | 0.14 | 9.78   | 0.00 | 0.64   |
|                 | age squared |            | -0.01 | 0.22 | 0.00   | 0.95 | 0.99   |
|                 | Intercept   |            | 0.38  | 0.06 | 44.32  | 0.00 | 1.46   |
| Variance        |             | 0.9%       |       |      |        |      |        |
| Random          | MED         | 19.2%      |       |      |        |      |        |
|                 | ACG         | 23.7%      |       |      |        |      |        |
|                 | Residual    | 56.2%      |       |      |        |      |        |
|                 | Total       | 100.0%     |       |      |        |      |        |
| <hr/>           |             |            |       |      |        |      |        |
| <b>Center C</b> |             |            |       |      |        |      |        |
| Fixed           | age         |            | -0.44 | 0.18 | 5.97   | 0.01 | 0.65   |
|                 | age squared |            | 0.10  | 0.43 | 0.06   | 0.81 | 1.11   |
|                 | Intercept   |            | 1.85  | 0.06 | 811.80 | 0.00 | 6.36   |
| Variance        |             | 0.4%       |       |      |        |      |        |
| Random          | MED         | 0.3%       |       |      |        |      |        |
|                 | ACG         | 35.7%      |       |      |        |      |        |
|                 | Residual    | 63.7%      |       |      |        |      |        |
|                 | Total       | 100.0%     |       |      |        |      |        |
| <hr/>           |             |            |       |      |        |      |        |
| <b>Center D</b> |             |            |       |      |        |      |        |
| Fixed           | age         |            | 0.30  | 0.26 | 1.39   | 0.24 | 1.36   |
|                 | age squared |            | -0.86 | 0.60 | 2.07   | 0.15 | 0.42   |
|                 | Intercept   |            | -2.05 | 0.10 | 453.37 | 0.00 | 0.13   |
| Variance        |             | 0.4%       |       |      |        |      |        |
| Random          | MED         | 0.1%       |       |      |        |      |        |
|                 | ACG         | 16.6%      |       |      |        |      |        |
|                 | Residual    | 83.0%      |       |      |        |      |        |
|                 | Total       | 100.0%     |       |      |        |      |        |
| <hr/>           |             |            |       |      |        |      |        |
| <b>Center E</b> |             |            |       |      |        |      |        |
| Fixed           | age         |            | -0.54 | 0.16 | 10.99  | 0.00 | 0.58   |
|                 | age squared |            | -0.26 | 0.37 | 0.48   | 0.49 | 0.77   |
|                 | Intercept   |            | -0.34 | 0.07 | 23.63  | 0.00 | 0.71   |
| Variance        |             | 1.1%       |       |      |        |      |        |
| Random          | MED         | 27.9%      |       |      |        |      |        |
|                 | ACG         | 17.1%      |       |      |        |      |        |
|                 | Residual    | 54.0%      |       |      |        |      |        |
|                 | Total       | 100.0%     |       |      |        |      |        |

**Supplementary table 8**  
**Parameter estimates by center for Level expenditure**  
**Pediatrics**

|                 | Parameter   | % variance | Estimate | Std. Error | Wald  | Sig. | 95% CI |       |
|-----------------|-------------|------------|----------|------------|-------|------|--------|-------|
|                 |             |            |          |            |       |      | lower  | upper |
| <b>Center A</b> |             |            |          |            |       |      |        |       |
| Fixed           | Intercept   |            | 3.67     | 0.19       | 19.77 | 0.00 | 3.23   | 4.11  |
|                 | age         |            | -0.53    | 0.11       | -4.74 | 0.00 | -0.75  | -0.31 |
|                 | age squared |            | 0.09     | 0.06       | 1.43  | 0.15 | -0.03  | 0.22  |
| Variance        |             | 0.8%       | 0.02     |            |       |      |        |       |
| Random          | Residual    | 71.5%      | 1.54     | 0.06       | 27.38 | 0.00 | 1.43   | 1.65  |
|                 | ACG         | 25.4%      | 0.55     | 0.17       | 3.28  | 0.00 | 0.30   | 0.99  |
|                 | MED         | 2.3%       | 0.05     | 0.05       | 0.94  | 0.35 | 0.01   | 0.40  |
| Total variance  |             | 100.0%     | 2.15     |            |       |      |        |       |
| <hr/>           |             |            |          |            |       |      |        |       |
| <b>Center B</b> |             |            |          |            |       |      |        |       |
| Fixed           | Intercept   |            | 3.38     | 0.56       | 6.05  | 0.09 | -2.46  | 9.21  |
|                 | age         |            | 0.36     | 0.14       | 2.63  | 0.01 | 0.09   | 0.62  |
|                 | age squared |            | -0.58    | 0.29       | -1.97 | 0.05 | -1.15  | 0.00  |
| Variance        |             | 0.55%      | 0.02     |            |       |      |        |       |
| Random          | Residual    | 68.3%      | 2.12     | 0.10       | 22.16 | 0.00 | 1.94   | 2.31  |
|                 | ACG         | 12.1%      | 0.38     | 0.12       | 3.03  | 0.00 | 0.20   | 0.72  |
|                 | MED         | 19.0%      | 0.59     | 0.84       | 0.70  | 0.48 | 0.04   | 9.67  |
| Total variance  |             | 100.0%     | 3.10     |            |       |      |        |       |
| <hr/>           |             |            |          |            |       |      |        |       |
| <b>Center C</b> |             |            |          |            |       |      |        |       |
| Fixed           | Intercept   |            | 4.36     | 0.21       | 21.14 | 0.00 | 3.93   | 4.79  |
|                 | age         |            | -0.16    | 0.09       | -1.67 | 0.09 | -0.34  | 0.03  |
|                 | age squared |            | -0.52    | 0.27       | -1.94 | 0.05 | -1.05  | 0.00  |
| Variance        |             | 0.6%       | 0.02     |            |       |      |        |       |
| Random          | Residual    | 62.7%      | 1.98     | 0.05       | 36.36 | 0.00 | 1.88   | 2.09  |
|                 | ACG         | 35.8%      | 1.13     | 0.30       | 3.82  | 0.00 | 0.68   | 1.89  |
|                 | MED         | 0.9%       | 0.03     | 0.03       | 0.88  | 0.38 | 0.00   | 0.26  |
| Total variance  |             | 100.0%     | 3.16     |            |       |      |        |       |
| <hr/>           |             |            |          |            |       |      |        |       |
| <b>Center D</b> |             |            |          |            |       |      |        |       |
| Fixed           | Intercept   |            | 3.10     | 0.17       | 18.18 | 0.02 | 1.70   | 4.49  |
|                 | age         |            | 0.43     | 0.34       | 1.26  | 0.21 | -0.25  | 1.11  |
|                 | age squared |            | -0.36    | 0.59       | -0.60 | 0.55 | -1.52  | 0.81  |
| Variance        |             | 0.8%       | 0.01     |            |       |      |        |       |
| Random          | Residual    | 96.0%      | 1.58     | 0.18       | 8.95  | 0.00 | 1.27   | 1.97  |
|                 | ACG         | 1.3%       | 0.02     | 0.07       | 0.32  | 0.75 | 0.00   | 10.11 |
|                 | MED         | 2.0%       | 0.03     | 0.07       | 0.45  | 0.65 | 0.00   | 2.52  |
| Total variance  |             | 100.0%     | 1.65     |            |       |      |        |       |
| <hr/>           |             |            |          |            |       |      |        |       |
| <b>Center E</b> |             |            |          |            |       |      |        |       |
| Fixed           | Intercept   |            | 3.49     | 0.14       | 25.69 | 0.00 | 3.20   | 3.77  |
|                 | age         |            | 0.17     | 0.19       | 0.86  | 0.39 | -0.21  | 0.55  |
|                 | age squared |            | -0.33    | 0.47       | -0.69 | 0.49 | -1.25  | 0.60  |
| Variance        |             | 0.4%       | 0.01     |            |       |      |        |       |
| Random          | Residual    | 88.2%      | 2.30     | 0.14       | 15.94 | 0.00 | 2.04   | 2.60  |
|                 | ACG         | 11.3%      | 0.29     | 0.18       | 1.63  | 0.10 | 0.09   | 0.98  |
|                 | MED         | 0.0%       | 0.00     | 0.00       | -     | -    | -      | -     |
| Total variance  |             | 100.0%     | 2.61     |            |       |      |        |       |
